# Supplementary material for: Predicting the occurrence of embolic events: an analysis of 1456 episodes of infective endocarditis from the Italian Study on Endocarditis (SEI)
Source: PubMed Central journal article supplement (PMC4101861; doi:10.1186/1471-2334-14-230), 2014-04-29
Supplement: 1471-2334-14-230-S4.pdf [file 1471-2334-14-230-S4.pdf]

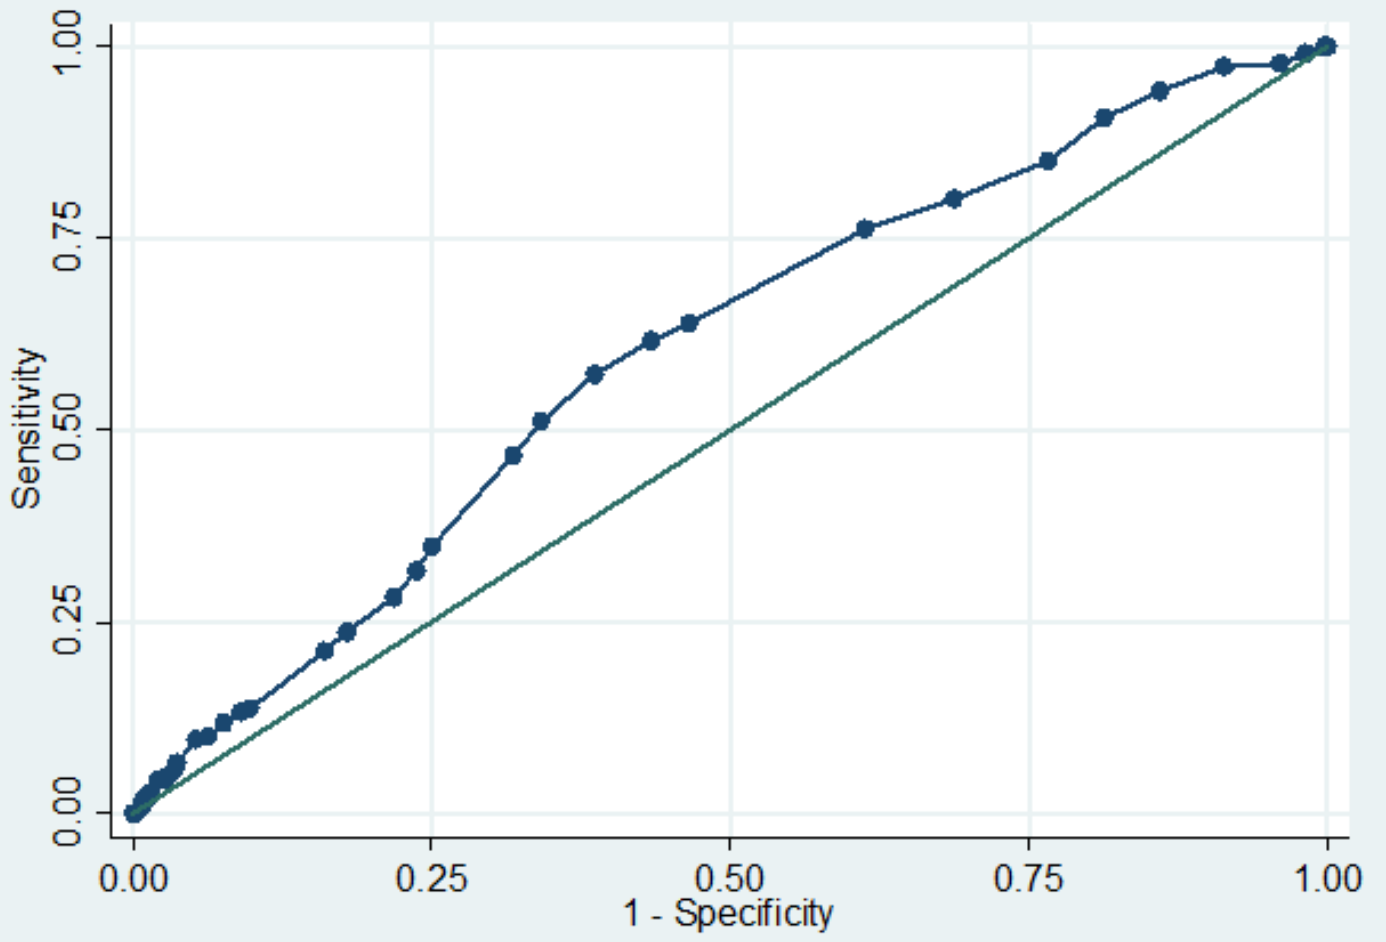

Area under ROC curve = 0.6019
